# Supplementary material
Source: PubMed Central journal article supplement (PMC3046311)
Supplement: NIHMS264513-supplement-1.pdf [file NIHMS264513-supplement-1.pdf]

## Supplementary Figure Legends

**Supplementary Fig. S1.** Linearity and sensitivity of Promega Stop and Glo reagent for detection of *Gaussia princeps* luciferase (GLuc) activity. GLuc activity was assayed using the procedures described in Section 2.4. The assay was carried out using 10-fold serial dilutions of purified Gluc (New England Biolabs). RLU, relative light units.

**Supplementary Fig. S2.** Inhibition of *Gaussia princeps* luciferase (GLuc) activity by pre-incubation with GLuc antibody (Ab). Assays were carried out in the presence or absence of anti-GLuc Ab, as described in Section 2.4. Assays employed serial dilutions of purified Gluc, as described in Supplementary Fig. S1. RLU, relative light units.

**Supplementary Fig. S3.** Most frequently found dinucleotide sequence flanking introns in *Brugia malayi*. An analysis of 100 *B. malayi* introns was conducted as described in Section 3.1. The figure summarizes the most commonly found dinucleotides found to flank the 5' and 3' ends of these introns.
